# Supplementary material
Source: PubMed Central journal article supplement (PMC4294231)
Supplement: IAI.02521-14_zii002151057so1.pdf [file IAI.02521-14_zii002151057so1.pdf]

# 1 Supplementary information

## 2 Figure S1

A

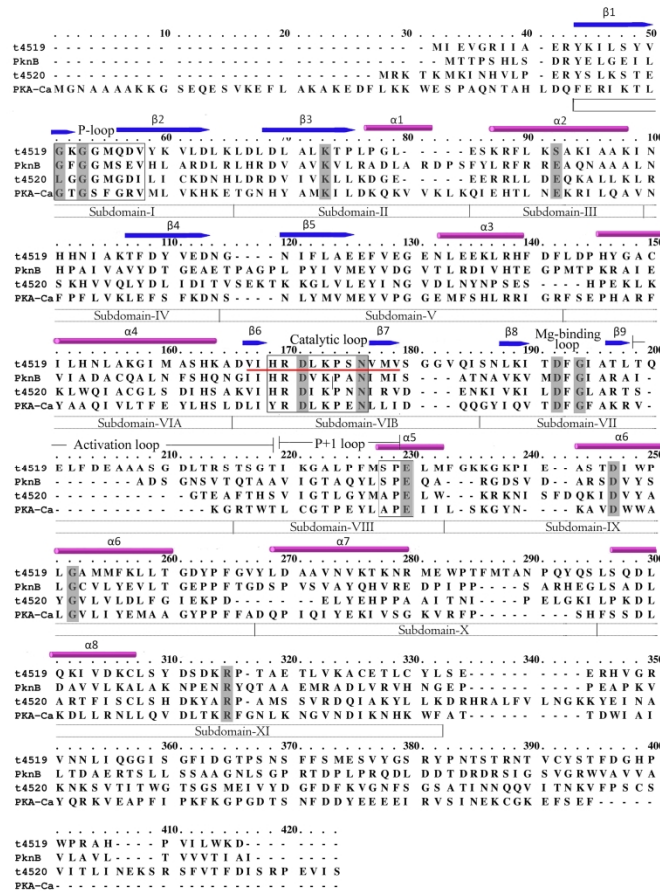

B

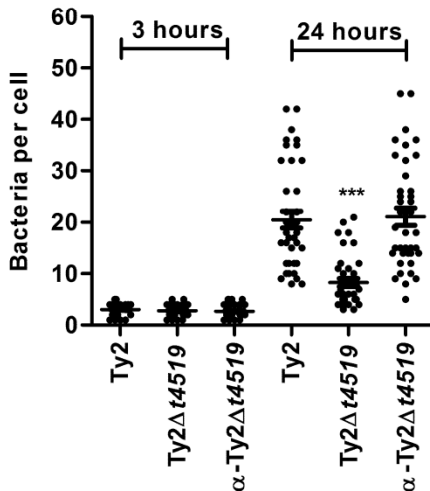

C

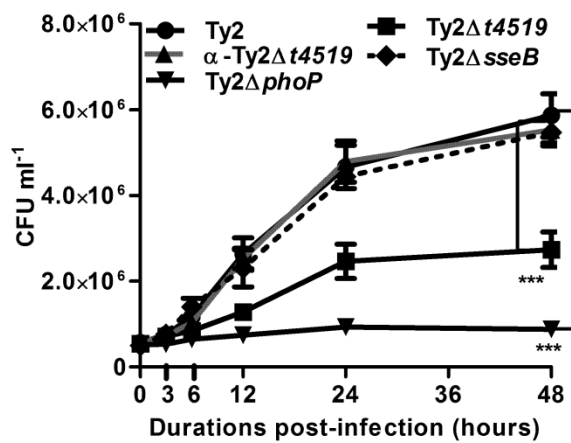

3

D

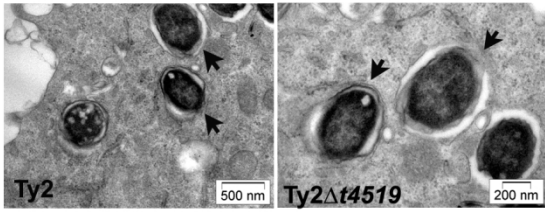

E

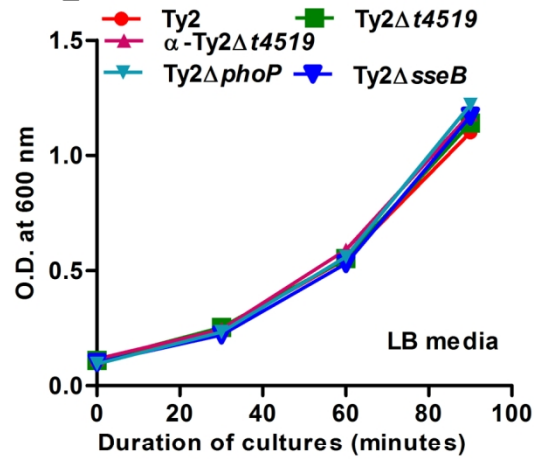

F

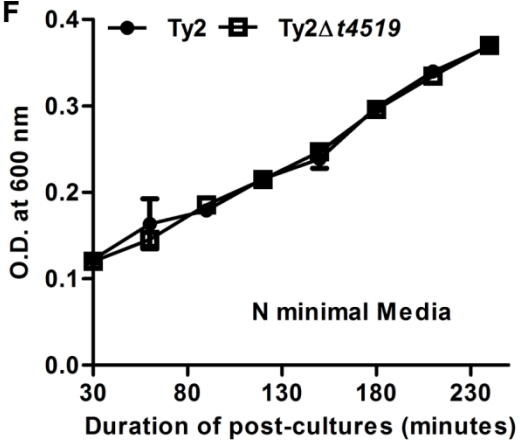

G

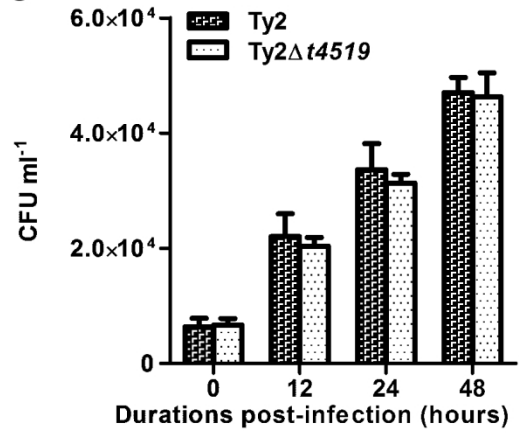

4  
5  
6  
7  
8  
9  
10  
11  
12

13 Figure S2

A

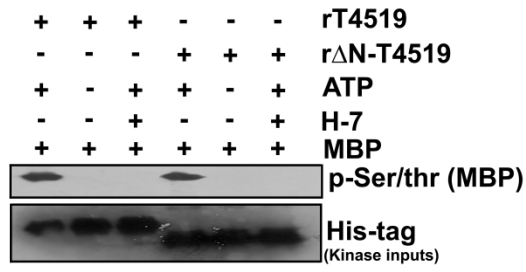

B

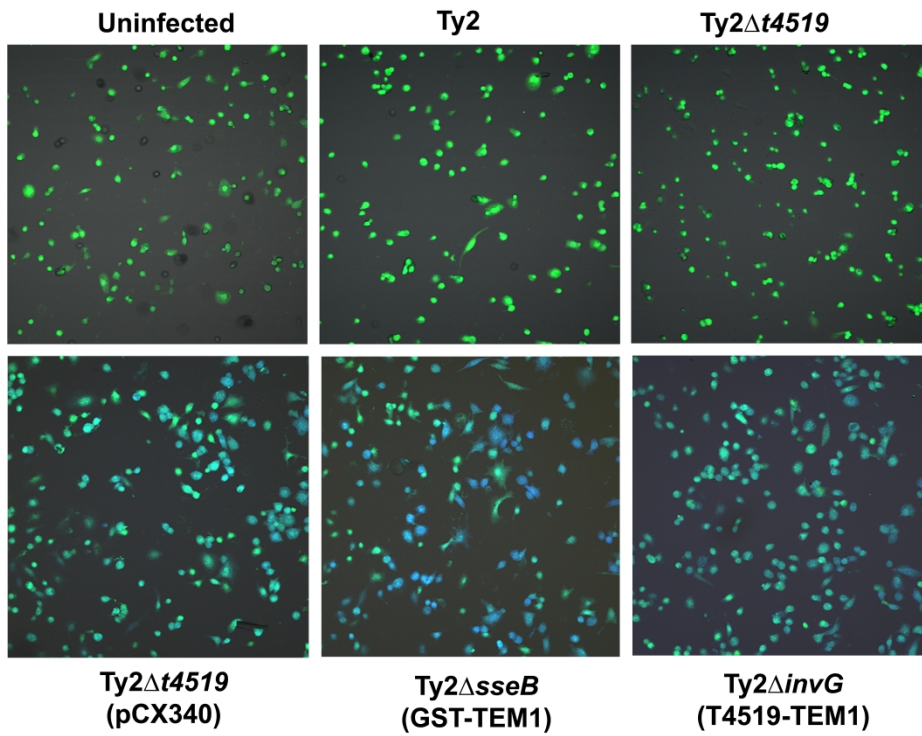

14

15

16

17

18

19

20

21

22 Figure S3

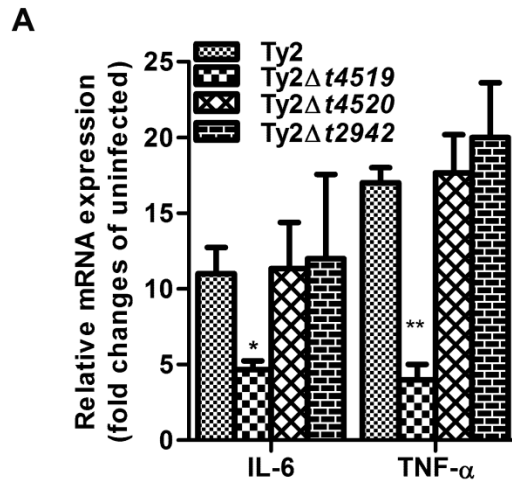

23

24 Figure S4

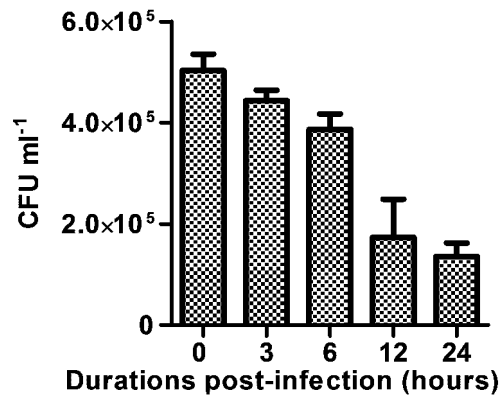

25

26

27

28

29

30

31 **Table S1:** List of plasmids and bacterial strains used in this study.

| <b>Vector/Bacterial Strain</b>     | <b>Genotype</b> | <b>Reference</b> |
|------------------------------------|-----------------|------------------|
| pBluescriptSK+                     |                 | Stratagene       |
| pCVD442                            |                 | Addgene (11074)  |
| pCVD442-Ty2 $\Delta$ <i>t4519</i>  |                 | This study       |
| pCVD442- $\Delta$ <i>t4520</i>     |                 | This study       |
| pCVD442- $\Delta$ <i>t4521</i>     |                 | This study       |
| pCVD442- $\Delta$ <i>phoP</i>      |                 | This study       |
| pCVD442- $\Delta$ <i>sseB</i>      |                 | This study       |
| pET28a+                            |                 | Novogen          |
| pET28a+- <i>t4519</i>              |                 | This study       |
| pET28a+ $\Delta$ N- <i>t4519</i>   |                 | This study       |
| pET28a+ $\Delta$ pkc- <i>t4519</i> |                 | This study       |
| pET28a+ $\Delta$ C- <i>t4519</i>   |                 | This study       |
| pET28a+T4520                       |                 | This study       |
| pET28a+T2544                       |                 | This study       |

|                                                                       |                  |                       |
|-----------------------------------------------------------------------|------------------|-----------------------|
| pET28a+T2942                                                          |                  | (1)                   |
| pQE-60                                                                |                  | D. Chakraborty, India |
| pQE60- <i>t4519</i>                                                   |                  | This study            |
| pCX340                                                                |                  | Eric Oswald, France   |
| pCX340- <i>t4519</i>                                                  |                  | In this study         |
| pCX312                                                                |                  | Eric Oswald, France   |
| <i>Salmonella</i> enterica subsp. enterica<br>serovar Typhi Ty2 (Ty2) |                  | ATCC                  |
| <i>Salmonella</i> serovar Typhimurim<br>LT214028s (LT2)               |                  | ATCC                  |
| E. coli DH5 $\alpha$                                                  |                  | T Ramamurthy, India   |
| DH5 $\alpha$ - $\lambda$ pir                                          |                  | T Ramamurthy, India   |
| SM10 $\lambda$ -pir                                                   |                  | T Ramamurthy, India   |
| BL21(DE3)                                                             |                  | Novogen               |
| Ty2 $\Delta$ <i>t4519</i>                                             | <i>t4519</i> (-) | This study            |
| Ty2 $\Delta$ <i>t4520</i>                                             | <i>t4520</i> (-) | This study            |

|                                         |                                                        |            |
|-----------------------------------------|--------------------------------------------------------|------------|
| Ty2Δ <i>t4521</i>                       | <i>t4521</i> (-)                                       | This study |
| Ty2Δ <i>phoP</i>                        | <i>phoP</i> (-)                                        | This study |
| Ty2Δ <i>sseB</i>                        | <i>sseB</i> (-)                                        | This study |
| Ty2Δ <i>invG</i>                        | <i>invG</i> (-)                                        | This study |
| Ty2Δ <i>t2942</i>                       | <i>T2942</i> (-)                                       | (1)        |
| Ty2Δ <i>t4519</i> -pQE60- <i>t4519</i>  | <i>t4519</i> complemmt (+)                             | This study |
| Ty2Δ <i>t4519</i> -pCX340- <i>t4519</i> | <i>t4519-βlactamase</i><br>fusion (+)                  | This study |
| Ty2Δ <i>sseB</i> -pCX340- <i>t4519</i>  | <i>sseB</i> (-) and <i>t4519-βlactamase</i> fusion (+) | This study |
| Ty2Δ <i>invG</i> -pCX340- <i>t4519</i>  | <i>invG</i> (-) and <i>t4519-βlactamase</i> fusion (+) | This study |
| Ty2Δ <i>t4519</i> -pCX340               |                                                        | This study |
| LT2- <i>t4519</i>                       | <i>t4519</i> complemmt (+)                             | This study |

32

33

34

35 **Table S2:** List of primers was used in this study.

| <b>Primer Name</b> | <b>5'&lt;-----Sequence-----&gt;3'</b> |
|--------------------|---------------------------------------|
| t4519mut 5armFP    | GGTAAAGGTGGGATGCAAGA                  |
| t4519mut 5armRP    | AACATCTGCTTTATGAGATGCC                |
| t4519mut 3armFP    | GCTACGCTAACACAAGAAC                   |
| t4519mut 3armRP    | TCACATGCCTTAACAAGCG                   |
| t4519 Full FP      | CATATGATCATGATTGAAGTCGGAAGAATCATTGCA  |
| t4519 Full RP      | CTCGAGTCAATCTTTCCAAAGAATTACAGGGTG     |
| t4519 RTFP         | GTGCCAAAATCGCTGCAAA                   |
| t4519 RTRP         | AACATCTGCTTTATGAGATGCC                |
| 16sRNA RTFP        | TGGGTTAAGTCCCGCAACG                   |
| 16sRNA RTRP        | TGAGGTCCGCTTGCTCTCG                   |
| t4519 N-ter(del)FP | GAATTCCATATGGTGCCAAAATCGCTGCAAA       |
| t4519 N-ter(del)RP | CTCGAGTCAATCTTTCCAAAGAATTACAGGGTG     |
| t4519 C-ter(del)FP | CATATGATCATGATTGAAGTCGGAAGAATCATTGCA  |
| t4519 c-ter(del)RP | CTCGAGTCACATGCCTTAACAAGCG             |
| phoPmut 5armFP     | GAATTCGTCGTGCTGGTGCTTTCTCT            |
| phoPmut 5armRP     | CGCATCATCGTCATCTTCAC                  |
| phoPmut 3armFP     | GATATCGGTAGCGGCGTGTTGTTAAG            |
| phoPmut 5armRP     | TCTAGACGGCGTATTGTTCCGTAATC            |
| sseBmut 5armFP     | GAATTCCAGGAAACATCTTATGGGG             |



|                      |                               |
|----------------------|-------------------------------|
| sseBmut 5armRP       | GATATCTTCAGCGTTCTTCTGGAC      |
| sseBmut 3armFP       | GATATCGCTGGATAAAGGTGGCCTAC    |
| sseBmut 3armRP       | TCTAGAGAATACGTTTTCTGCGCTATC   |
| invGmut 5armFP       | 5' ATGGCGCTACAGCTAAAGGAG 3'   |
| invGmut 5armRP       | 5' CCCACGAAGGTATTGTTTCAGAC 3' |
| invGmut 3armFP       | 5' CTGGTTAAAGCGCTGGATGT 3'    |
| invGmut 3armRP       | 5' CCACATTACGTTCCCAATC 3'     |
| t4520mut 5armFP      | AGCACTGAACTCGGTGGTGGC         |
| t4520mut 5armRP      | TTCGGGGTGACTTTCTGACGG         |
| t4520mut 3armRP      | CATATGGCGATAACCAATATACCTGAA   |
| t4520mut 3armFP      | CTCGAGCGGTCTAGATATATCAAAGGTG  |
| t4521mut 5armFP      | TGGTTAGCTCGTTCTTCG            |
| t4521mut 5armRP      | TGTTGAACCGCCATGTCC            |
| t4521mut 3armFP      | CATATGGCTCAATATGTTCAATGGTGC   |
| t4521mut 3armRP      | CTCGAGGCTTGTAATGGATGGATCTTG   |
| T4520 FP full length | CATATGATGAGGAAAACAAAATGAAG    |
| T4520 RP full length | CTCGAGTGATATTACCTCCGGTCTAG    |
| T2544 FP full length | CATATGGAAGGGATCTATATCACCGGGA  |
| T2544 RP full length | CTCGAGTTAAAAGGCGTAAGTAATGCCG  |
| T2942 FP full length | CCATGGACCGGAGAGAAGAAGATG      |
| T2942 RP full length | AGATCTGAACCGGTAACCCACGCCAAGAT |
| hGAPDH RTFP          | GAGAACGGGAAGCTTGTCATC         |

|                   |                          |
|-------------------|--------------------------|
| hGAPDH RTRP       | CATGACGAACATGGGGGCATC    |
| hTNF- $\alpha$ FP | GTGACAAGCCTGTAGCCCATGTTG |
| hTNF- $\alpha$ RP | CTTGATGGCAGAGAGGAGGTTGAC |
| hIL-6 FP          | GACCAGTGATGATTTTCACCAGGC |
| hIL-6 RP          | GCACTGGCAGAAAACAACCTGAAC |

36

37

### 38 References

- 39 1. Chowdhury R, Mandal RS, Ta A, Das S. 2014. An AIL family protein promotes Type  
 40 Three Secretion System-1 independent invasion and pathogenesis of *Salmonella enterica*  
 41 serovar Typhi. Cellular microbiology. doi: 10.1111/cmi.12379.

### 42 Figure legends

43 **Fig. S1.** T4519, a putative Ser/Thr protein kinase of *S. Typhi*, is required for macrophage  
 44 survival and replication. (A) Primary sequence alignment between the catalytic subunit of PKA  
 45 (PKA-Ca), *M. tuberculosis* PknB (residues 1 to 350), T4519 and T4520 using Clustal X. The  
 46 conserved motifs are shown in boxes and the invariant residues are marked in grey. Subdomains  
 47 are denoted by roman numerals. PROSITE Database Ser/Thr kinase active site signature  
 48 sequence is underlined red. Corresponding secondary structural information is also provided. (B)  
 49 Visual counts of intracellular bacteria as in Fig 1C. Dots represent bacterial counts per cell in  
 50 random fields. Statistical significance was calculated by Nonparametric test. (C) RAW 264.7  
 51 macrophages were infected with Ty2 or the mutant. Intracellular CFU counts at the indicated  
 52 time points from the cells subjected to gentamicin protection assay were plotted. (D) THP-1 cells

53 were infected with Ty2 or Ty2 $\Delta$ t4519 strain and processed for Transmission Electron  
54 Microscopy. Images are representative of two independent experiments. Arrowheads indicate  
55 intact bacteria within phagosomes. Micron bars are shown at the lower right corners. (E and F)  
56 *In vitro* growth kinetics of *S. Typhi* strains cultured in Luria betani broth or N Minimal Medium.  
57 Optical density of the cultures at 600 nm (OD<sub>600</sub>) was measured at indicated times. Data  
58 represent two independent experiments. (G) Gentamicin protection assay was done as above with  
59 HT-29 cells infected with Ty2 or Ty2 $\Delta$ t4519 and intracellular CFU counts after overnight culture  
60 in Luria agar plate were plotted. Error bars, mean  $\pm$  SD of three independent experiments.  
61 \*\*\*p<0.001 (Student's t test).

62 **Fig. S2.** T4519 is a secreted Serine/Threonine protein kinase. (A) *In vitro* kinase assays. Full-  
63 length rT4519 protein or r $\Delta$ N-T4519 (2  $\mu$ g) was incubated with the substrate (MBP, 5  $\mu$ g) for 1  
64 hour. Kinase activities were monitored by immunoblots for phosphorylation of MBP. The  
65 reaction was performed in the absence or presence of ATP (10 mM) and H7-dihydrochloride (1  
66  $\mu$ M). One of two independent experiments is shown. (B) PMA-differentiated THP-1 cells were  
67 infected with the Ty2 or mutant strains as indicated in the figure and subjected to gentamicin  
68 protection assay. Some of the mutant strains expressed TEM1 fusion proteins. Cells were  
69 cultured as in fig. 1 for 6 hour followed by loading with CCF2-AM (1  $\mu$ M) and analyzed by  
70 confocal microscopy after excitation at 410 nm wavelength. Emission was captured at 510 nm  
71 (green) and 450 nm (blue). One of the two independent experiments is shown.

72 **Fig. S3.** T4519 regulates cytokine/chemokine responses. RT-qPCR shows GAPDH-normalized  
73 expression of cytokines and chemokines at 12 hours post-infection of Ty2 or mutant strains.  
74 Error bars, mean  $\pm$  SD of three independent experiments. \*p<0.05; \*\*p<0.01; compared with  
75 Ty2 infection (Student's t test).

76 **Fig. S4.** Human monocyte-derived macrophages were infected with the Ty2 strain at a MOI of  
77 10 and live intracellular bacterial counts were analyzed in a gentamicin protection assay as in  
78 Fig. 1 at the indicated time points.
